# Supplementary material for: Ultrafast Joule heating-induced formation of amorphous CoFeNi phosphate for efficient and stable oxygen evolution reaction
Source: Royal Society of Chemistry journal article supplement (doi:10.1039/d4ta03130j), 2024-01-01
Supplement: d4ta03130j1.pdf [file d4ta03130j1.pdf]

## Electronic Supplementary Information

# Ultrafast Joule Heating-Induced Formation of Amorphous CoFeNi Phosphate for Efficient and Stable Oxygen Evolution Reaction

Junhao Ma,<sup>1,‡</sup> Chonghan Xia,<sup>1,‡</sup> Teddy Salim,<sup>1</sup> Yee Yan Tay,<sup>1</sup> Lydia H. Wong,<sup>1</sup>  
and Kwan W. Tan<sup>1,\*</sup>

### Affiliations:

<sup>1</sup>School of Materials Science and Engineering, Nanyang Technological University,  
Singapore 639798, Singapore.

<sup>‡</sup>These authors contribute equally to the work.

\*Correspondence: [kwtan@ntu.edu.sg](mailto:kwtan@ntu.edu.sg)

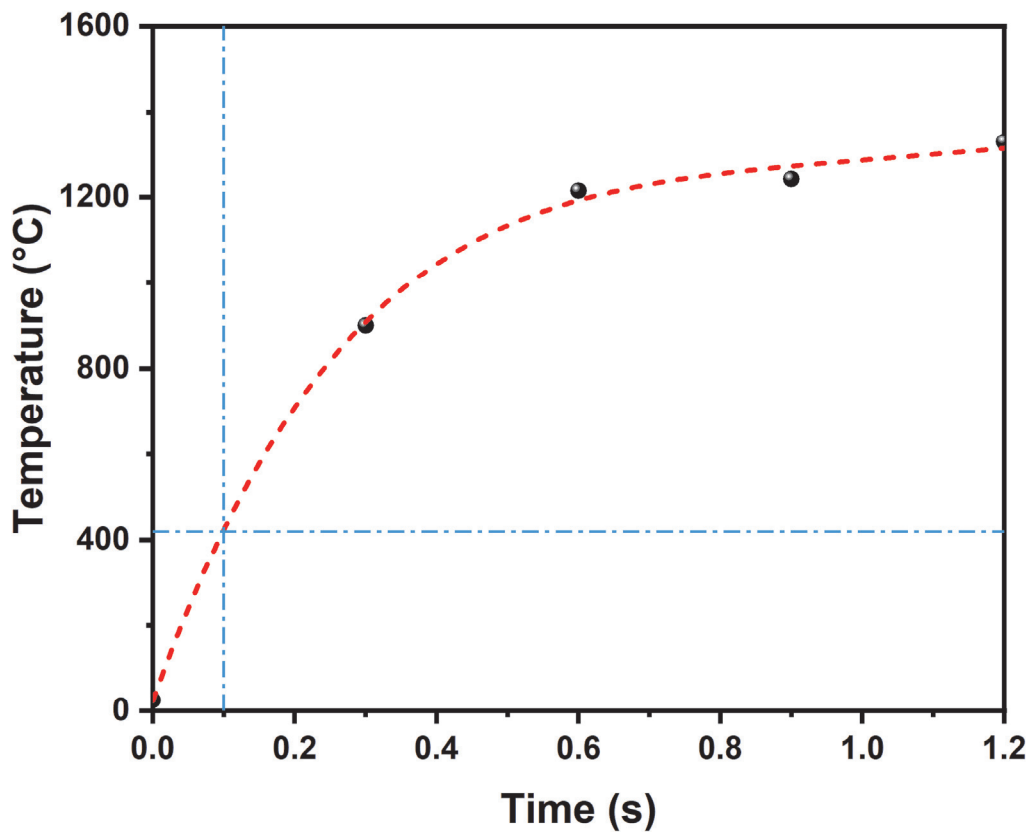

**Figure S1.** Empirical plot of infrared temperature versus heating time during Joule heating set at 22 V and 20 A. The red-colored dashed line represents the results obtained from polynomial regression analysis using the data points. The horizontal and vertical blue dashed-dotted lines indicate the estimated temperature for a 100 ms heating time is  $\sim 420$  °C.

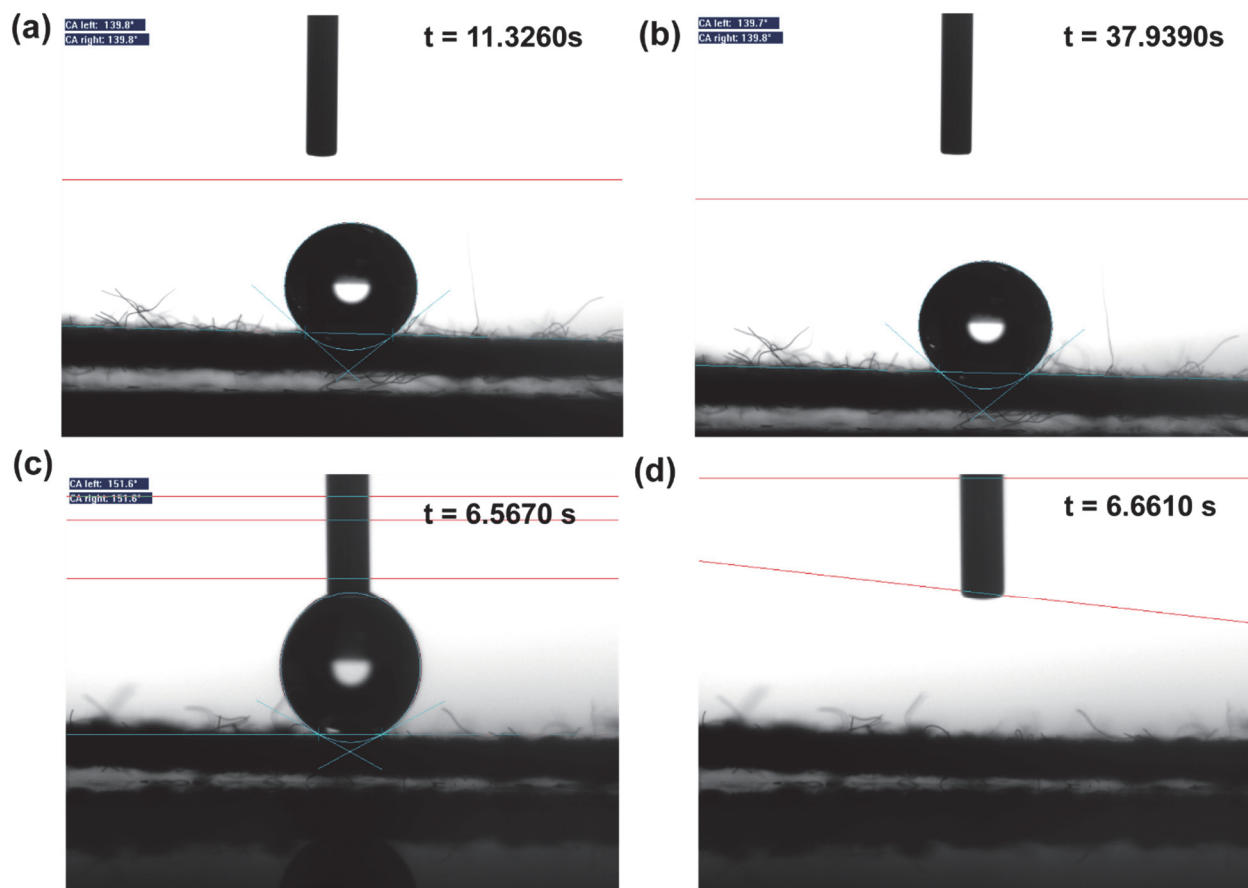

**Figure S2.** Water contact angle measurements were conducted on (a, b) original carbon cloth and (c, d) heat-treated and KOH-activated carbon cloth (ACC). The water droplet contact angle on the original carbon cloth remained  $\sim 139.8^\circ$  even after a waiting time of 26 s (a and b), indicating its hydrophobic nature. In contrast, water droplets wet the surface of ACC in less than 0.2 s (c and d), confirming that ACC is superhydrophilic.

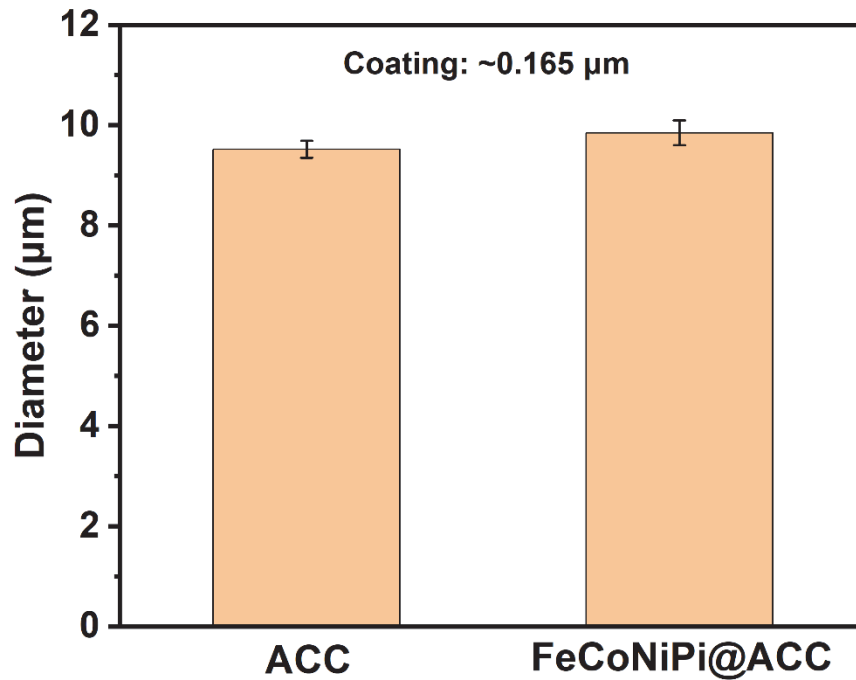

**Figure S3.** The bar charts display diameter measurements of individual uncoated ACC fibers and CoFeNiPi@ACC fibers after Joule heating. The thickness of the CoFeNiPi@ACC coating is around 165 nm.

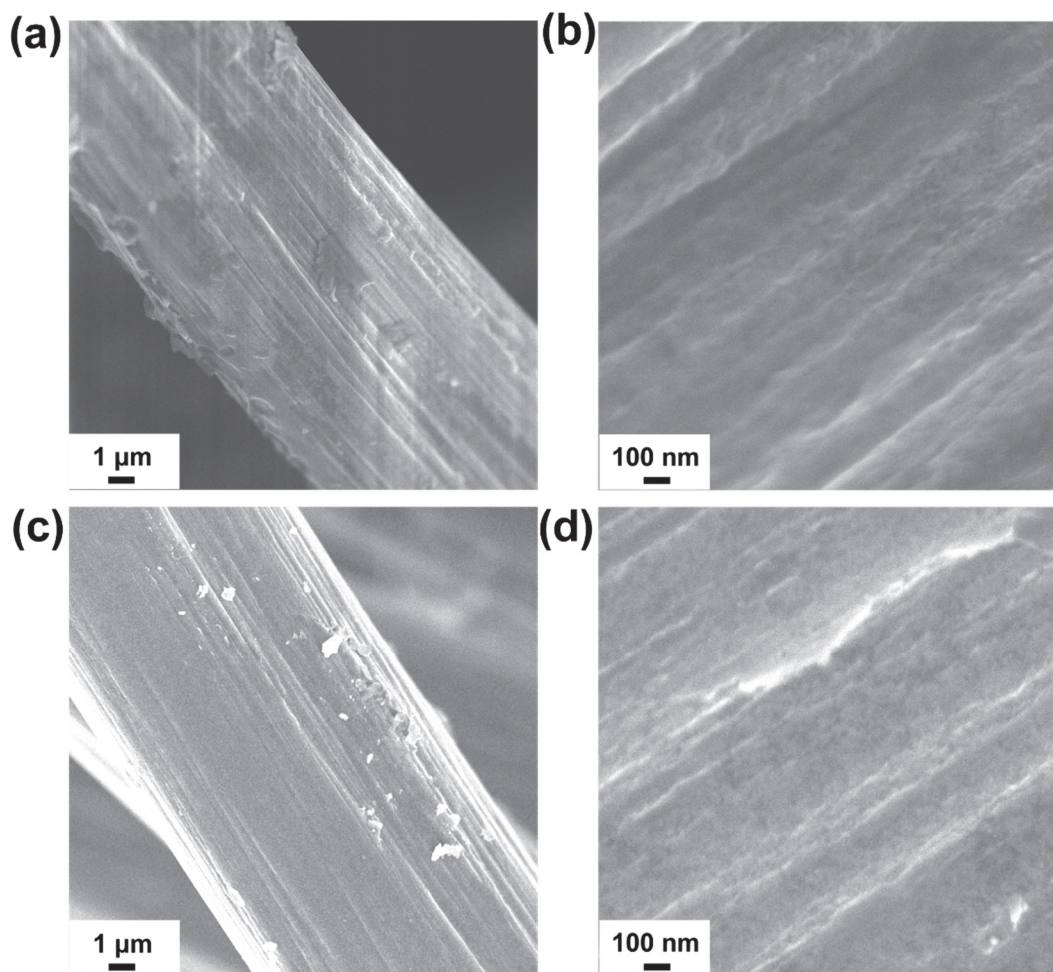

**Figure S4.** SEM micrographs show the relatively smooth surfaces of (a, b) CoPi@ACC and (c, d) CoFePi@ACC after Joule heating for 100 ms at  $\sim 420$  °C.

**Table S1.** Atomic percentages of CoFeNiPi@ACC as determined by HAADF-STEM EDS.

| <b>Element</b> | <b>CoFeNiPi@ACC</b> | <b>CoFeNiPi@ACC-24h</b> |
|----------------|---------------------|-------------------------|
| Ni             | 1.84                | 2.16                    |
| Co             | 1.73                | 1.60                    |
| Fe             | 2.36                | 2.12                    |
| P              | 18.29               | 4.12                    |
| O              | 75.78               | 89.99                   |

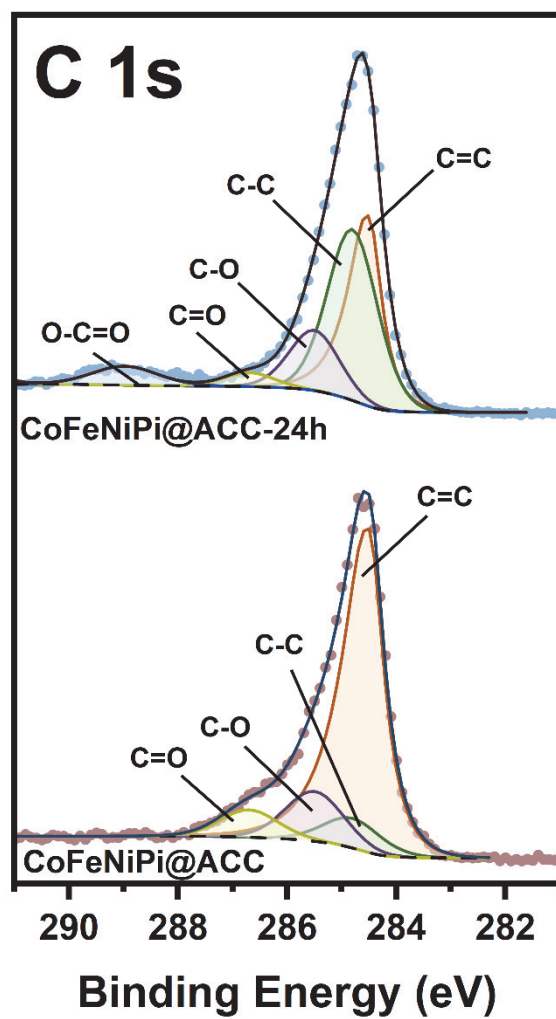

**Figure S5.** XPS analysis of CoFeNiPi@ACC and CoFeNiPi@ACC-24h samples showing the C 1s spectrum .

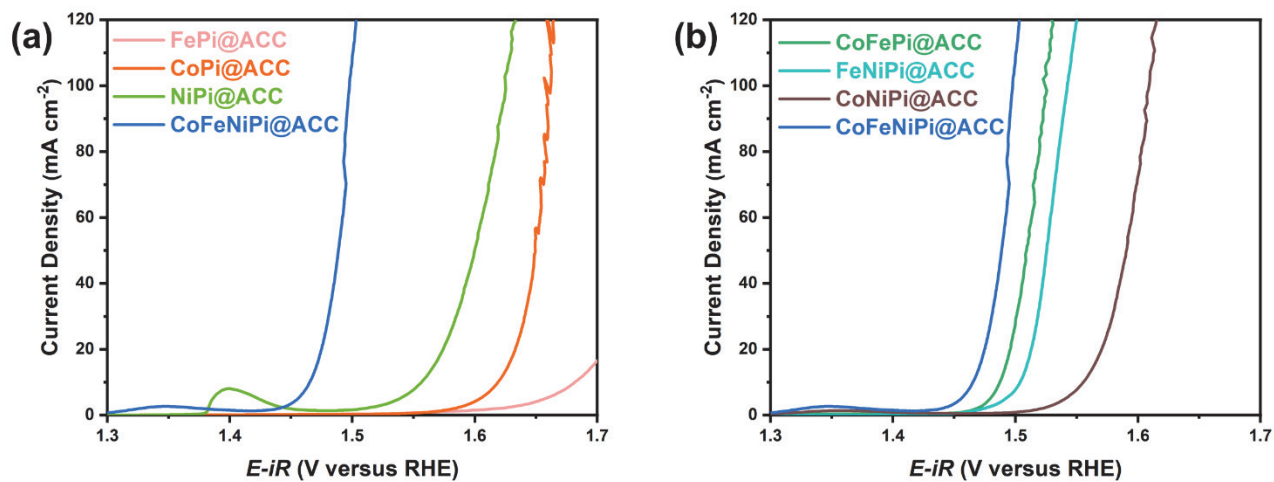

**Figure S6.** Polarization curves of (a) amorphous unary metal phosphates and (b) amorphous binary metal phosphates, compared to CoFeNiPi@ACC.



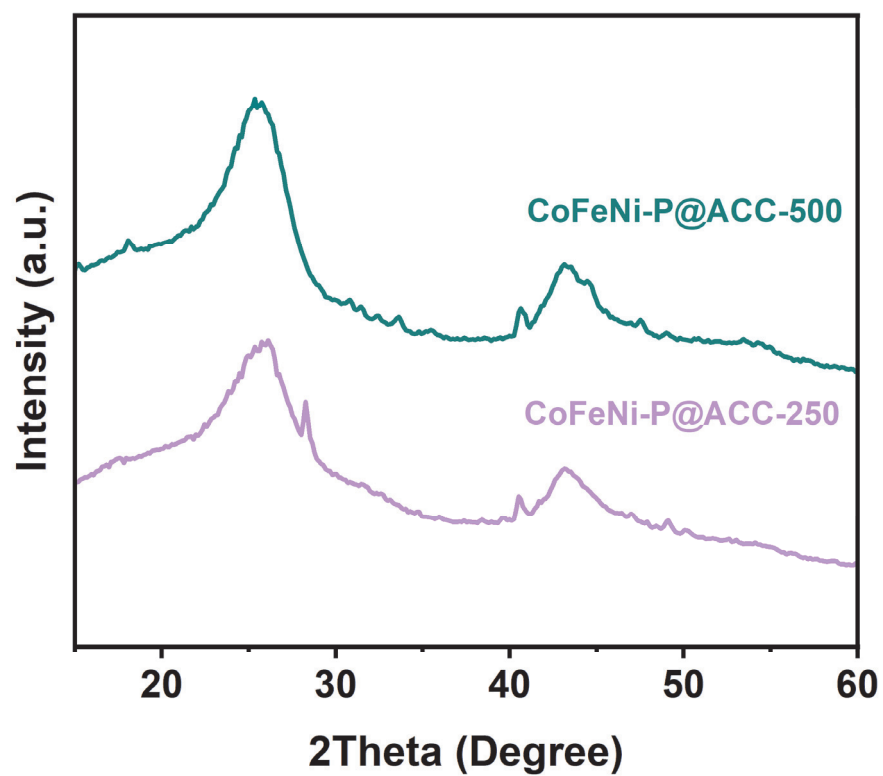

**Figure S7.** WAXS patterns of CoFeNi-based phosphorous-containing samples that were Joule heated for 250 ms (violet curve) and 500 ms (green curve) show the appearance of new reflections, indicating that both samples are crystalline.

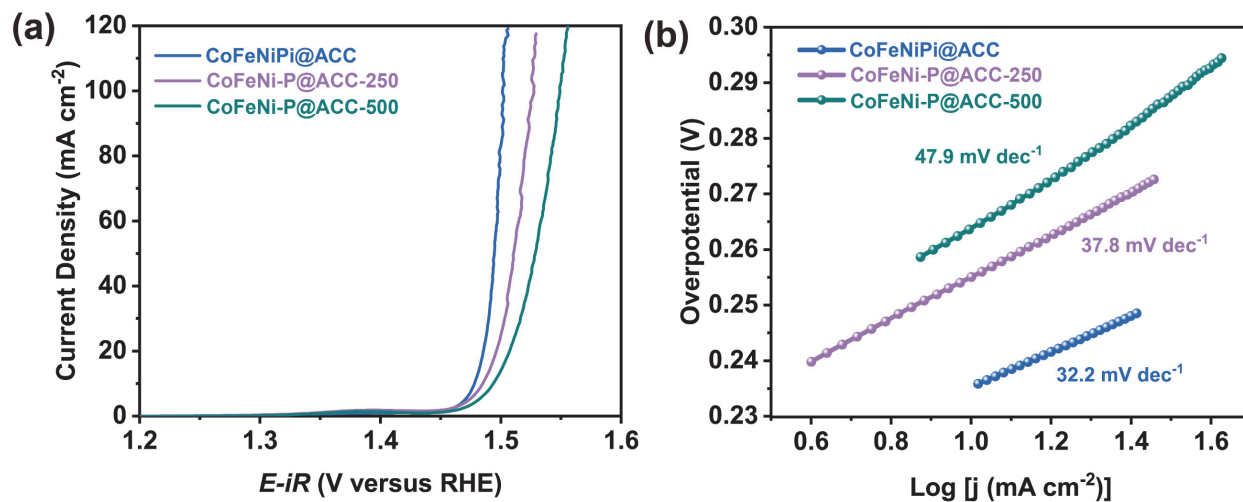

**Figure S8.** (a) Polarization curves and (b) Tafel slopes of crystalline CoFeNi-P@ACC-250 and crystalline CoFeNi-P@ACC-500, compared to amorphous CoFeNiPi@ACC. To drive a 100 mA cm<sup>-2</sup> current density, the overpotential value of amorphous CoFeNiPi@ACC is the lowest (267 mV), compared to crystalline CoFeNi-P@ACC-250 (298 mV) and crystalline CoFeNi-P@ACC-500 (319 mV). Additionally, the amorphous CoFeNiPi@ACC has the lowest Tafel slope (32.2 mV dec<sup>-1</sup>), compared to the crystalline CoFeNi-P@ACC-250 (37.8 mV dec<sup>-1</sup>) and crystalline CoFeNi-P@ACC-500 (47.9 mV dec<sup>-1</sup>).

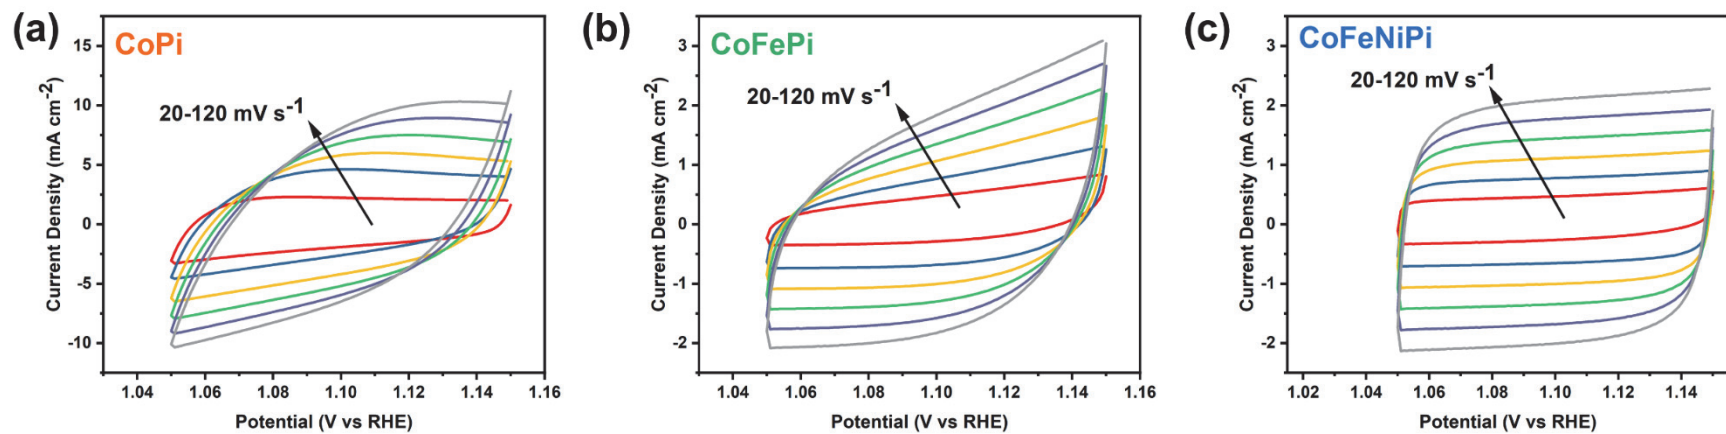

**Figure S9.** Cyclic voltammety plots of the amorphous metal phosphate catalysts measured between 1.05 to 1.15 V at various scan rates from 20 to 120 mV s<sup>-1</sup>: (a) CoPi@ACC, (b) CoFePi@ACC, and (c) CoFeNiPi@ACC.

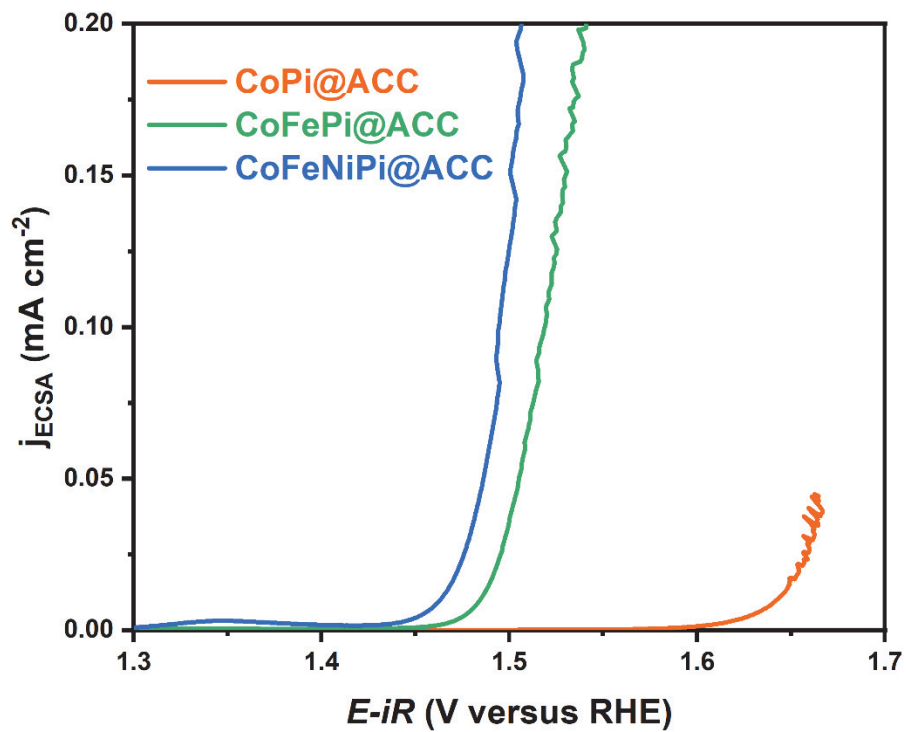

**Figure S10.** Polarization curves of amorphous metal phosphates as a function of electrochemical surface area (ECSA).

**Table S2.** Summary of the OER performance of recent phosphate-based electrocatalysts in alkaline media.

| Electrocatalyst                                                        | $\eta_{10}/\text{mV}$ | Tafel slope/ $\text{mV dec}^{-1}$ | ECSA/ $\text{cm}^2$ | Ref.      |
|------------------------------------------------------------------------|-----------------------|-----------------------------------|---------------------|-----------|
| FeCoNiPi@ACC                                                           | 235                   | 32.2                              | 430                 | This work |
| NiCoFeMnMoPi                                                           | 270                   | 74                                | -                   | 1         |
| Ni <sub>1.5</sub> Sn@triMPO <sub>4</sub>                               | 240                   | 45.2                              | -                   | 2         |
| CoNiPi@V-Co <sub>4</sub> N                                             | 270                   | 54.7                              | 9655                | 3         |
| Co <sub>1.6</sub> Ni <sub>0.4</sub> P <sub>4</sub> O <sub>12</sub> -C  | 230                   | 51.1                              | 432.5               | 4         |
| Co <sub>3</sub> (OH) <sub>2</sub> (HPO <sub>4</sub> ) <sub>2</sub> /NF | 240                   | 69                                | 107.5               | 5         |
| TiO <sub>2</sub>  Co <sub>2</sub> P <sub>4</sub> O <sub>12</sub>       | 330                   | 44                                | -                   | 6         |
| V-Fe <sub>2</sub> /FePO <sub>4</sub>                                   | 270                   | 45.1                              | 454                 | 7         |

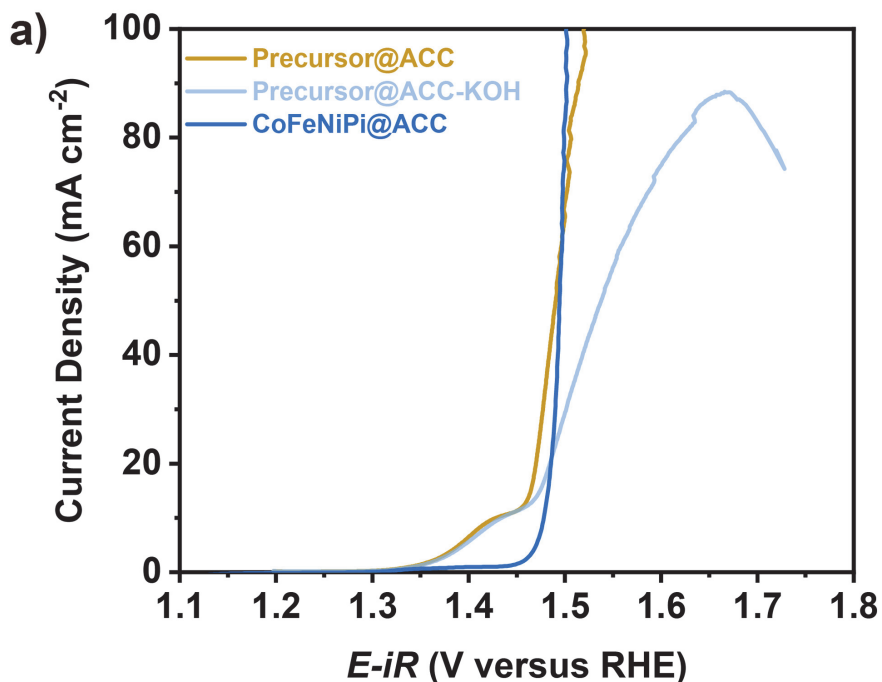

b)

|                         | ICP-OES result         |                        |                        |
|-------------------------|------------------------|------------------------|------------------------|
|                         | Fe/ $\text{mg L}^{-1}$ | Co/ $\text{mg L}^{-1}$ | Ni/ $\text{mg L}^{-1}$ |
| KOH (CoFeNiPi@ACC-KOH)  | -                      | -                      | -                      |
| KOH (Precursor@ACC-KOH) | 0.369                  | -                      | -                      |

**Figure S11.** (a) Polarization curves of Joule heating-induced amorphous CoFeNiPi@ACC compared with those of metal salt/phytic acid precursor coated on the ACC, activated and after immersion in 1 M KOH for 3 h. (b) Summary of ICP-OES results showing the leached metal content after amorphous CoFeNiPi@ACC and precursor@ACC were immersed in 1 M KOH for 3 h.

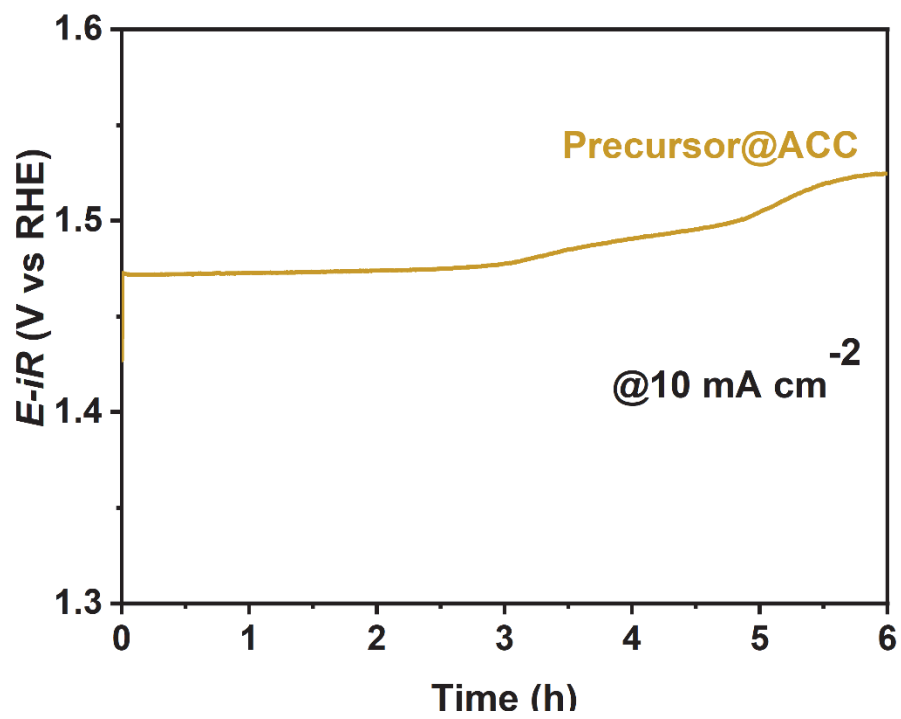

**Figure S12.** Chronopotentiometry curve for metal salt/phytic acid precursor@ACC over 6 h at a constant current density of  $10 \text{ mA cm}^{-2}$ .

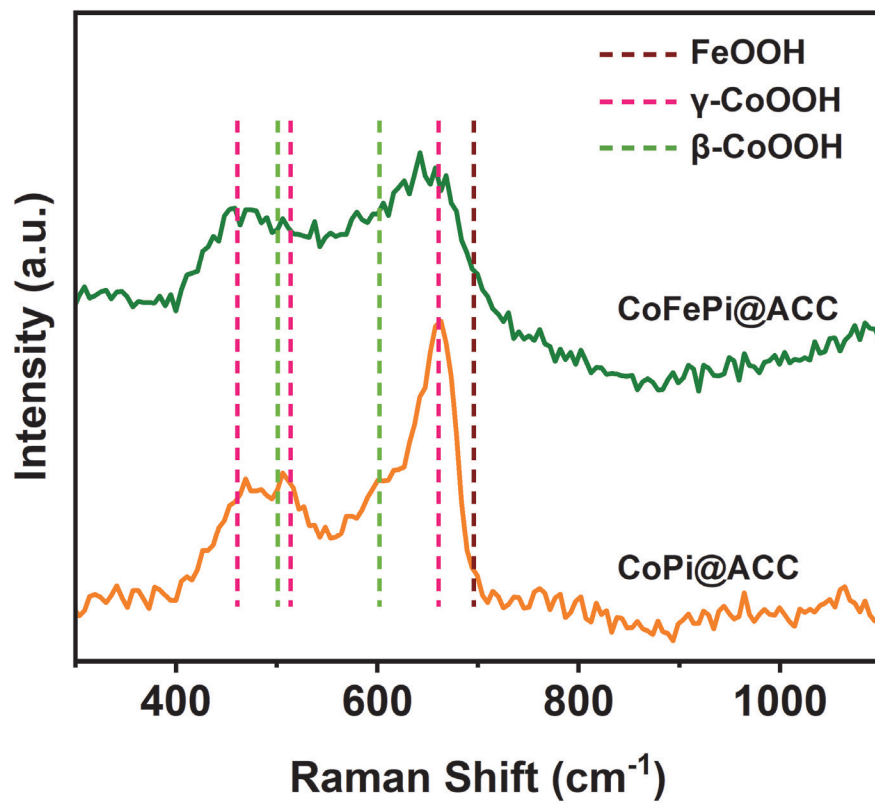

**Figure S13.** Raman spectra of CoPi@ACC and CoFePi@ACC in the activated state.



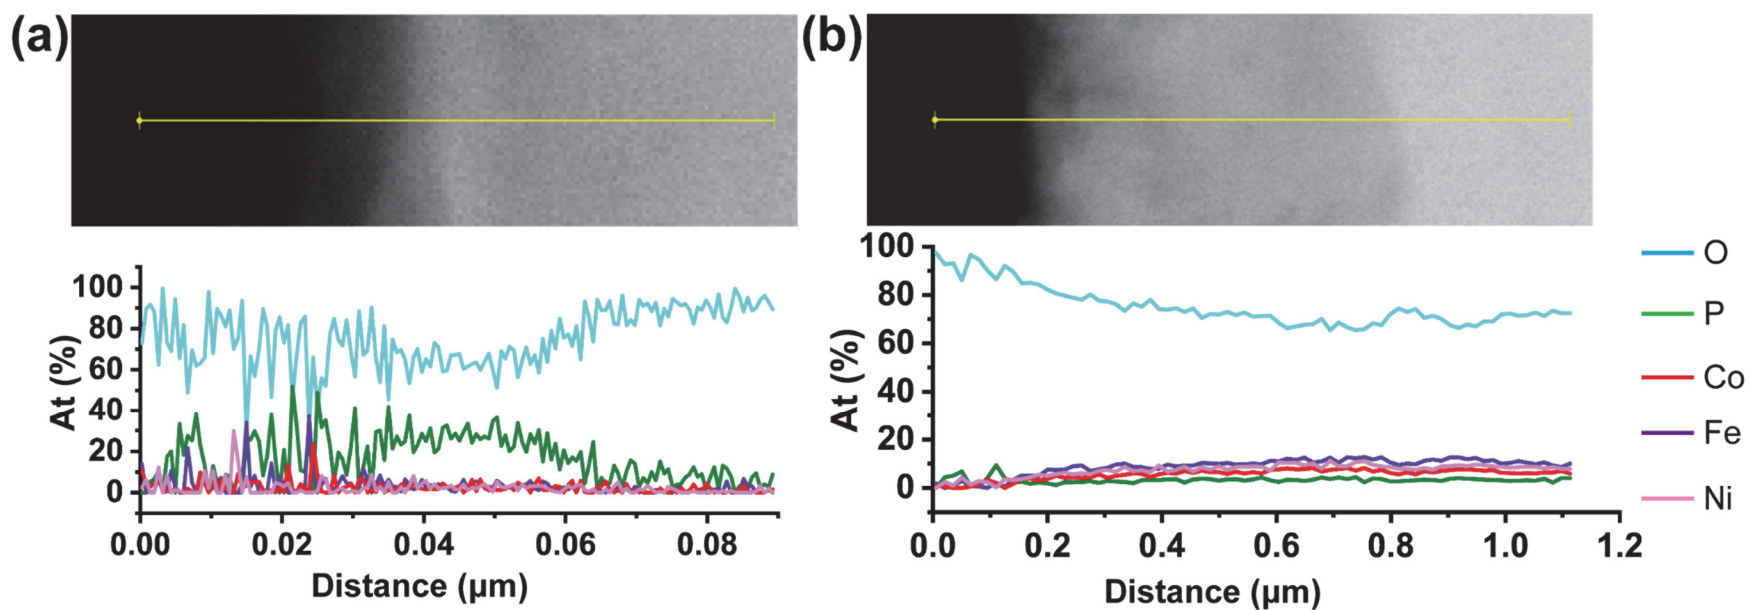

**Figure S14.** EDS line scan analysis of the CoFeNiPi@ACC catalysts in the (a) as-made state after Joule heating and (b) after chronopotentiometry at a constant current density of 10 mA/cm<sup>2</sup> for 100 h.

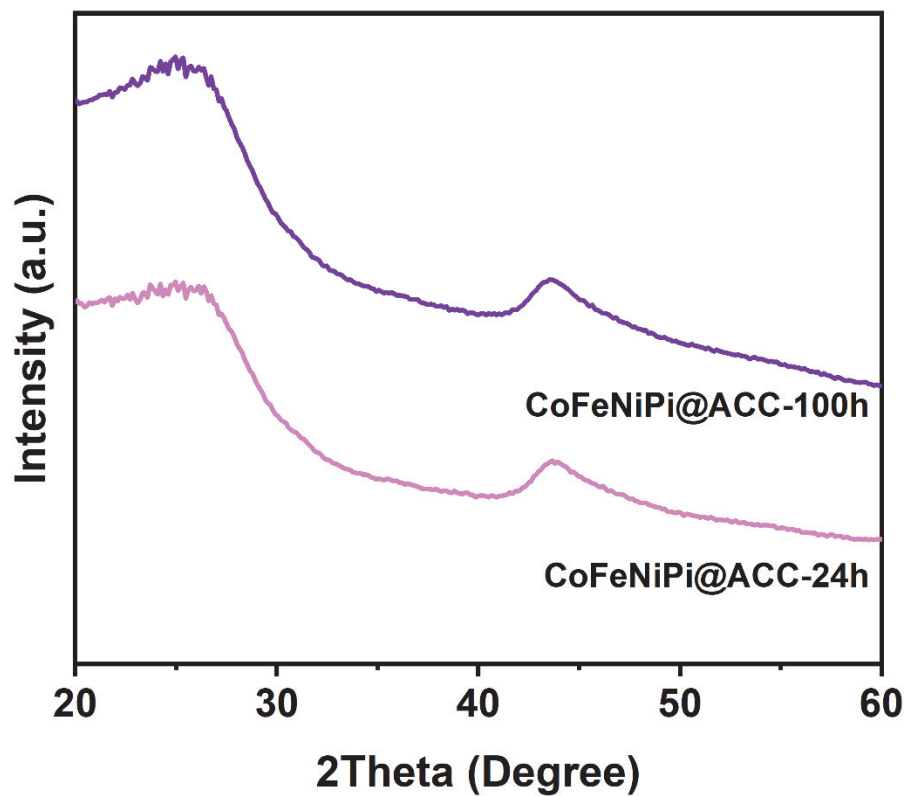

**Figure S15.** WAXS spectra of CoFeNiPi@ACC catalysts after chronopotentiometry at a constant current density of  $10 \text{ mA cm}^{-2}$  over 24 and 100 h.

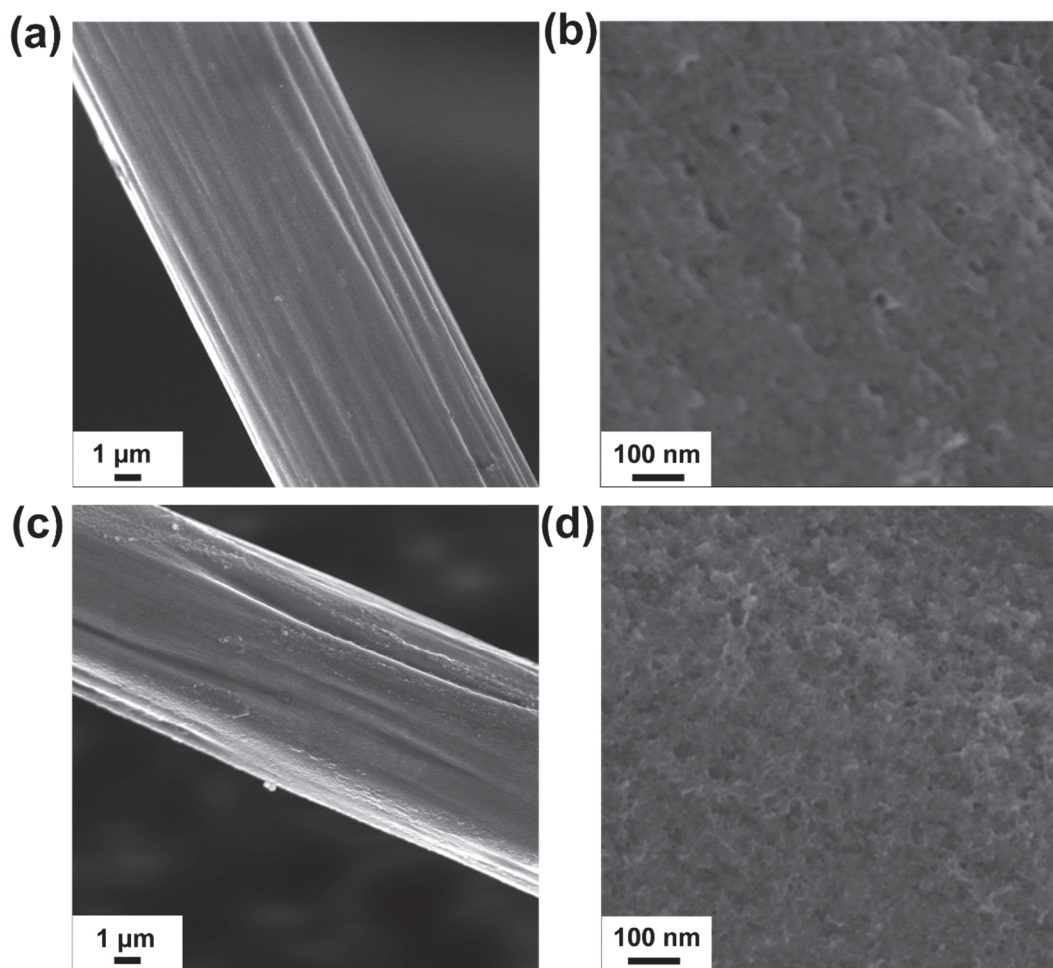

**Figure S16.** SEM images of CoFePi@ACC catalysts after chronopotentiometry at a constant current density of  $10 \text{ mA cm}^{-2}$  for (a,b) 24 h and (c, d) 100 h.

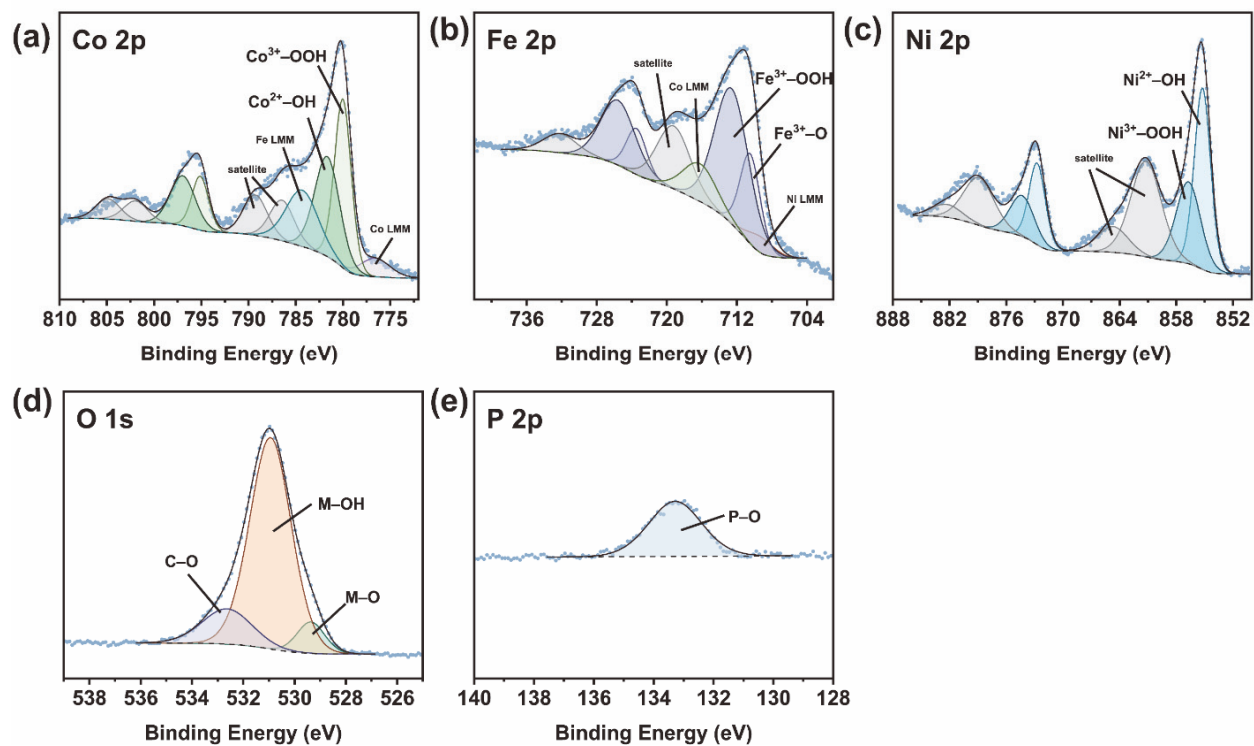

**Figure S17.** XPS analysis of CoFeNiPi@ACC-100h sample showing the spectra of (a) Co 2p, (b) Fe 2p, (c) Ni 2p, (d) O 1s, and (e) P 2p.

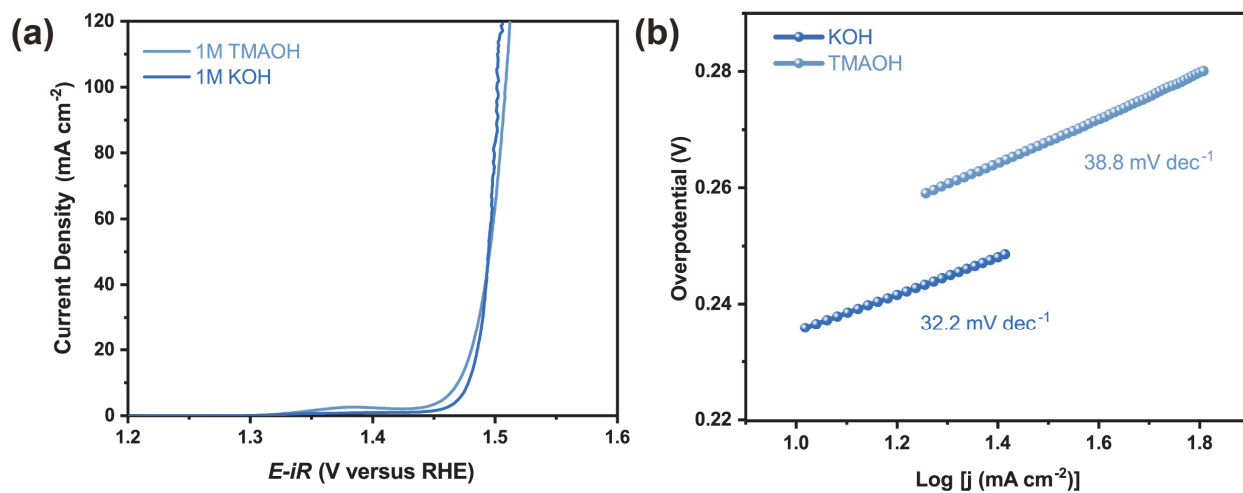

**Figure S18.** (a) Polarization curves and (b) Tafel slopes of ternary metal phosphate CoFeNiPi@ACC in TMAOH compared to KOH.

## **Reference**

- (1) Qiao, H.; Wang, X.; Dong, Q.; Zheng, H.; Chen, G.; Hong, M.; Yang, C.-P.; Wu, M.; He, K.; Hu, L. *Nano Energy* **2021**, *86*, 106029.
- (2) Li, S.; Li, Z.; Ma, R.; Gao, C.; Liu, L.; Hu, L.; Zhu, J.; Sun, T.; Tang, Y.; Liu, D.; Wang, J. *Angew. Chem., Int. Ed.* **2021**, *60* (7), 3773–3780.
- (3) Singh, T. I.; Maibam, A.; Cha, D. C.; Yoo, S.; Babarao, R.; Lee, S. U.; Lee, S. *Adv. Sci.* **2022**, *9* (23), 2201311.
- (4) Li, Y.; Wang, Z.; Hu, J.; Li, S.; Du, Y.; Han, X.; Xu, P. *Adv. Funct. Mater.* **2020**, *30* (25), 1910498.
- (5) Menezes, P. W.; Panda, C.; Walter, C.; Schwarze, M.; Driess, M. *Adv. Funct. Mater.* **2019**, *29* (32), 1808632.
- (6) Lv, C.; Xu, S.; Yang, Q.; Huang, Z.; Zhang, C. *J. Mater. Chem. A* **2019**, *7* (20), 12457–12467.
- (7) Ngo, Q. P.; Nguyen, T. T.; Singh, M.; Balaji, R.; Kim, N. H.; Lee, J. H. *Appl. Catal., B* **2023**, *331*, 122674.
